# Supplementary material for: Study on the Epidemiological Status and Influencing Factors of Allergic Diseases in Children Aged 0-6: A Population-Based Survey
Source: Research Square preprint supplement (doi:10.21203/rs.3.rs-8387235/v1), 2026-02-03
Supplement: Supplementary file 1 [file 20bbec92e6222793c7707abf.docx]

S1. Comorbidity of asthma and childhood allergic diseases

|  | Total (%) | Sex (%) | | P-Value | Age (%) | | P-Value |
| --- | --- | --- | --- | --- | --- | --- | --- |
|  | 3064 | girl | boy | 0.586 | ＜3 year | ≥3 year | ＜0.001 |
| Food allergic | 451 (14.7%) | 217 (48.1%) | 234 (51.9%) |  | 129 (28.6%) | 322 (71.4%) |  |
|  | | | | ＜0.001 |  |  | ＜0.001 |
| Asthma | 256 (8.4%) | 86 (33.6%) | 170 (66.4%) |  | 46 (18.0%) | 210 (82.0%) |  |
|  | | | | 0.946 |  |  | 0.001 |
| Atopic dermatitis | 578 (18.9%) | 272 (47.1%) | 306 (52.9%) |  | 274 (47.4%) | 304 (52.6%) |  |
|  | | | | 0.573 |  |  | ＜0.001 |
| Allergic rhinitis | 612 (20.0%) | 281 (45.9%) | 331 (54.1%) |  | 102 (16.7%) | 510 (83.3%) |  |
| Coexisting | | | | 0.057 |  |  | ＜0.001 |
| Food allergic and asthma | 70 (2.3%) | 25 (35.7%) | 45 (64.3%) |  | 10 (14.3%) | 60 (85.7%) |  |
|  | | | | 0.424 |  |  | 0.444 |
| Food allergic and atopic dermatitis | 160 (5.2%) | 80 (50.0%) | 80 (50.0%) |  | 61 (38.1%) | 99 (61.9%) |  |
|  | | | | 0.544 |  |  | ＜0.001 |
| Food allergic and allergic rhinitis | 181 (5.9%) | 81 (44.8%) | 100 (55.2%) |  | 25 (13.8%) | 156 (86.2%) |  |
|  | | | | 0.021 |  |  | ＜0.001 |
| Asthma and atopic dermatitis | 79 (2.6%) | 27 (34.2%) | 52 (65.8%) |  | 12 (15.2%) | 67 (84.8%) |  |
|  | | | | 0.003 |  |  | ＜0.001 |
| Asthma and allergic rhinitis | 129 (4.2%) | 44 (34.1%) | 85 (65.9%) |  | 16 (12.4%) | 113 (87.6%) |  |
|  | | | | 0.999 |  |  | ＜0.001 |
| Atopic dermatitis and allergic rhinitis | 179 (5.8%) | 84 (46.9%) | 95 (53.1%) |  | 41 (22.9%) | 138 (77.1%) |  |
|  | | | | 0.050 |  |  | ＜0.001 |
| Asthma and Atopic dermatitis and allergic rhinitis | 46 (1.5%) | 15 (32.6%) | 31 (67.4%) |  | 4 (8.7%) | 42 (91.3%) |  |
|  | | | | 0.598 |  |  | ＜0.001 |
| Food allergic, atopic dermatitis and allergic rhinitis | 72 (2.3%) | 36 (50.0%) | 36 (50.0%) |  | 15 (20.8%) | 57 (79.2%) |  |
|  | | | | 0.172 |  |  | ＜0.001 |
| Food allergic, asthma and allergic rhinitis | 46 (1.5%) | 17 (37.0%) | 29 (63.0%) |  | 3 (6.5%) | 43 (93.5%) |  |
|  | | | | 0.575 |  |  | ＜0.001 |
| Food allergic, asthma and atopic dermatitis | 31 (1.0%) | 13 (41.9%) | 18 (58.1%) |  | 3 (9.7%) | 28 (90.3%) |  |
|  | | | | 0.707 |  |  | ＜0.001 |
| Comorbid for all four conditions | 21 (0.7%) | 9 (42.9%) | 12 (57.1%) |  | 0 (0.0%) | 21 (100.0%) |  |

Data were presented with frequency and percentage; p-value was calculated by Pearson’s chi-squared (χ2) test;

S2. Sensitivity Analysis: Multivariable Logistic Regression for Childhood Allergies After Adjusting for Birth Weight and Number of Children

| **Variable** | **Food allergy (AOR)** | **Asthma (AOR)** | **Atopic dermatitis (AOR)** | **Allergic rhinitis (AOR)** |
| --- | --- | --- | --- | --- |
| Age | 1.01 (0.94-1.09) | 1.03 (0.92-1.14) | **0.85 (0.79-0.91)** | **1.22 (1.13-1.31)** |
| Number of children | 0.87 (0.71-1.06) | 1.11 (0.87-1.43) | 0.88 (0.74-1.05) | **0.79 (0.66-0.95)** |
| Birth weight | 1.01 (0.93-1.10) | 1.06 (0.95-1.18) | **1.09 (1.01-1.18)** | 0.99 (0.92-1.08) |
| The number of months using air conditioners (within one year) | **1.07 (1.02-1.13)** | **1.09 (1.02-1.18)** | **1.06 (1.01-1.12)** | **1.08 (1.03-1.14)** |
| Gender (girls) | | | | |
| boys | 0.95 (0.77-1.17) | **1.96 (1.47-2.63)** | 0.99 (0.82-1.20) | 1.06 (0.87-1.29) |
| race (Han) | | | | |
| Others | **1.68 (1.00-2.80)** | 1.10 (0.54-2.26) | 1.07 (0.63-1.80) | 0.57 (0.31-1.07) |
| Degree of mother (Junior high school and below) | | | | |
| High school/vocational high school | 1.21 (0.42-3.49) | 1.62 (0.46-5.68) | 0.60 (0.32-1.14) | 0.87 (0.37-2.05) |
| Undergraduate | **3.00 (1.13-8.00)** | 1.75 (0.52-5.89) | 0.60 (0.33-1.08) | 1.19 (0.53-2.63) |
| Postgraduate | **3.26 (1.18-9.05)** | 2.15 (0.60-7.70) | 0.62 (0.33-1.18) | 1.14 (0.49-2.64) |
| Degree of Father (Junior high school and below) | | | | |
| High school/vocational high school | 0.61 (0.25-1.45) | 0.87 (0.29-2.67) | 1.27 (0.64-2.53) | 1.38 (0.56-3.36) |
| Undergraduate | 0.69 (0.31-1.53) | 0.97 (0.34-2.76) | 1.78 (0.93-3.42) | 2.20 (0.95-5.09) |
| Postgraduate | 0.71 (0.31-1.65) | 0.69 (0.23-2.11) | 1.78 (0.88-3.58) | 2.35 (0.98-5.67) |
| Premature birth (No) | | | | |
| Yes | 1.46 (0.97-2.20) | 1.13 (0.68-1.88) | 0.97 (0.71-1.34) | **1.57 (1.06-2.32)** |
| Birth mode (Vaginal delivery) | | | | |
| Cesarean section | 1.10 (0.88-1.36) | 0.89 (0.67-1.18) | 0.85 (0.70-1.03) | 0.94 (0.77-1.15) |
| Breastfeeding duration (< 6months) | | | | |
| ≥6 months | 1.03 (0.82-1.30) | 0.79 (0.58-1.06) | 0.94 (0.77-1.16) | 0.93 (0.75-1.15) |
| Has the child ever had pneumonia (No) |  |  |  |  |
| Yes | **1.62 (1.28-2.06)** | **3.65 (2.71-4.92)** | 1.08 (0.86-1.37) | **1.55 (1.25-1.92)** |
| Has the child ever had Pediatric inflammation (No) | | | | |
| Yes | 1.23 (0.83-1.81) | 1.21 (0.75-1.94) | **1.69 (1.18-2.43)** | 1.34 (0.95-1.89) |
| Has the child ever received antibiotic treatment (No) | | | | |
| Yes | **1.38 (1.04-1.82)** | **2.60 (1.65-4.11)** | **1.32 (1.03-1.68)** | **1.67 (1.29-2.17)** |
| Family historyof allergy (No) | | | | |
| Yes | **2.30 (1.82-2.90)** | **2.16 (1.57-2.96)** | **2.35 (1.92-2.89)** | **2.84 (2.28-3.52)** |
| Keep pets (No) | | | | |
| Yes | 0.76 (0.56-1.03) | 1.01 (0.69-1.47) | 0.80 (0.61-1.06) | 1.02 (0.78-1.33) |
| Raising plants (No) | | | | |
| Yes | 0.98 (0.79-1.22) | 0.95 (0.71-1.27) | 0.94 (0.77-1.14) | 0.95 (0.78-1.16) |
| Fresh air systems use (No) | | | | |
| Sometimes | 0.86 (0.60-1.24) | 1.20 (0.76-1.91) | 0.85 (0.61-1.19) | **0.69 (0.48-0.98)** |
| Often | 1.19 (0.75-1.88) | **0.33 (0.14-0.82)** | 0.67 (0.42-1.05) | 0.77 (0.48-1.23) |
| Mosquito repellents/mosquito repellents use (No) | | | | |
| Sometimes | 1.04 (0.83-1.30) | 0.87 (0.64-1.17) | 1.00 (0.81-1.23) | 0.93 (0.75-1.14) |
| Often | 0.72 (0.45-1.16) | 0.72 (0.39-1.34) | 1.37 (0.96-1.96) | 0.84 (0.55-1.30) |
| Air purifiers use (No) | | | | |
| Sometimes | 1.14 (0.89-1.46) | 0.73 (0.52-1.04) | 1.02 (0.80-1.29) | 0.93 (0.73-1.18) |
| Often | 0.97 (0.70-1.35) | 1.26 (0.83-1.90) | 1.03 (0.77-1.37) | 0.96 (0.71-1.30) |
| Incense/air fresheners use (No) | | | | |
| Sometimes | 0.91 (0.67-1.23) | 0.99 (0.67-1.46) | 0.94 (0.70-1.26) | 1.13 (0.86-1.48) |
| Often | 0.97 (0.51-1.84) | 0.73 (0.31-1.76) | 0.83 (0.45-1.50) | **1.95 (1.15-3.29)** |
| Open the Windows for ventilation within one day (0 times) | | | | |
| 1 | 0.45 (0.13-1.47) | **0.17 (0.05-0.61)** | **0.34 (0.12-0.95)** | 0.32 (0.09-1.14) |
| 2 | 0.55 (0.17-1.83) | **0.15 (0.04-0.54)** | **0.33 (0.12-0.92)** | 0.41 (0.12-1.43) |
| ≥3 | 0.46 (0.14-1.51) | **0.10 (0.03-0.36)** | **0.34 (0.12-0.94)** | 0.41 (0.12-1.42) |
| Daily exercise time for children (＜ 2 hours) | | | | |
| ≥2h | 1.08 (0.87-1.35) | 0.90 (0.67-1.21) | 1.01 (0.83-1.24) | 0.83 (0.68-1.02) |
| daily sleep time of children (＜10 hours) | | | | |
| 10-12 h | 0.96 (0.75-1.24) | 0.92 (0.66-1.28) | 1.11 (0.88-1.41) | 1.17 (0.93-1.47) |
| ≥12 h | **0.57 (0.38-0.87)** | **0.46 (0.25-0.88)** | 0.92 (0.67-1.26) | **0.38 (0.23-0.60)** |
| Are environment near the residence close to rivers, lakes, parks and green Spaces (No) | | | | |
| Yes | 1.16 (0.78-1.74) | 1.36 (0.80-2.30) | 0.89 (0.62-1.28) | 0.79 (0.52-1.20) |
| Residential floor (1-3 floors) | | | | |
| 4-6 floors | 1.04 (0.80-1.34) | 0.92 (0.66-1.28) | **1.27 (1.01-1.60)** | 1.16 (0.92-1.46) |
| ≥7 floors | 1.24 (0.95-1.62) | 0.85 (0.60-1.22) | 1.18 (0.92-1.50) | 0.99 (0.77-1.28) |
| Decoration situation of the permanent residence (Never) | | | | |
| Before pregnancy | 1.35 (0.90-2.02) | 0.84 (0.46-1.53) | **0.65 (0.42-1.00)** | 1.00 (0.66-1.50) |
| during pregnancy | **1.78 (1.01-3.16)** | 1.26 (0.56-2.84) | 0.96 (0.53-1.71) | 0.51 (0.25-1.04) |
| after birth | 1.12 (0.83-1.51) | 1.41 (0.97-2.04) | 1.27 (0.96-1.68) | 1.14 (0.87-1.49) |
| Wall materials for children's rooms (Others) | | | | |
| wall painting | 1.06 (0.84-1.35) | 1.01 (0.73-1.39) | **1.30 (1.06-1.61)** | 1.01 (0.81-1.27) |
| Habit of keeping Windows open in spring (No) | | | | |
| Sometimes | 1.06 (0.67-1.67) | 1.24 (0.69-2.24) | 0.90 (0.59-1.38) | 0.92 (0.60-1.40) |
| Often | 1.05 (0.56-1.98) | 1.53 (0.69-3.39) | 1.34 (0.77-2.36) | 1.02 (0.57-1.83) |
| Habit of keeping Windows open in summer (No) | | | | |
| Sometimes | 0.92 (0.68-1.24) | 1.16 (0.79-1.71) | 0.94 (0.72-1.23) | 1.07 (0.81-1.42) |
| Often | 0.88 (0.61-1.27) | 0.87 (0.54-1.39) | **0.69 (0.49-0.97)** | 0.95 (0.68-1.32) |
| Habit of keeping Windows open in fall (No) | | | | |
| Sometimes | 0.83 (0.52-1.32) | 0.92 (0.51-1.66) | 1.05 (0.68-1.60) | 1.09 (0.71-1.68) |
| Often | 0.77 (0.41-1.47) | 1.12 (0.50-2.49) | 0.84 (0.47-1.49) | 1.15 (0.64-2.08) |
| Habit of keeping Windows open in winter (No) | | | | |
| Sometimes | 1.14 (0.83-1.57) | **0.65 (0.43-0.99)** | 1.07 (0.80-1.42) | 0.98 (0.73-1.31) |
| Often | 1.02 (0.65-1.61) | **0.53 (0.29-0.97)** | 0.92 (0.61-1.37) | 0.82 (0.55-1.22) |
| Mother's exposure to secondhand smoke from family members during pregnancy (No) | | | | |
| Yes | **1.38 (1.03-1.83)** | 0.91 (0.61-1.34) | 1.18 (0.90-1.54) | 1.06 (0.80-1.40) |
| Mother smoking (No) | | | | |
| Yes | 0.76 (0.33-1.74) | 1.76 (0.78-3.96) | 0.52 (0.23-1.21) | 0.83 (0.40-1.73) |

Data were presented with OR and 95% CI; AOR adjusted odds ratio, CI confidence interval

The bold value indicates statistical significance (P < 0.05)

S3. Stratified Analysis: Multivariable Logistic Regression Results for Childhood Allergies and Independent Variables by Sex.

| Variable | Food allergy | | Asthma | | Atopic dermatitis | | Allergic rhinitis | |
| --- | --- | --- | --- | --- | --- | --- | --- | --- |
| girl | boy | girl | boy | girl | boy | girl | boy |
| Age | 1.00 (0.89-1.12) | 1.04 (0.93-1.16) | 1.03 (0.86-1.24) | 1.00 (0.88-1.15) | **0.88 (0.79-0.98)** | **0.83 (0.75-0.91)** | **1.24 (1.11-1.38)** | **1.24 (1.12-1.38)** |
| Birth weight | 0.99 (0.95-1.03) | 1.01 (0.96-1.05) | 1.00 (0.95-1.06) | **1.05 (1.01-1.10)** | 1.01 (0.98-1.04) | 1.02 (0.98-1.06) | 0.97 (0.93-1.02) | 1.00 (0.97-1.04) |
| Number of months using air conditioners | 1.01 (0.93-1.09) | **1.14 (1.06-1.23)** | 1.09 (0.96-1.24) | **1.12 (1.03-1.23)** | **1.09 (1.01-1.17)** | 1.03 (0.96-1.10) | 1.04 (0.96-1.12) | **1.12 (1.04-1.21)** |
| Race (Han) | | | | | | | | |
| Others | 1.92 (0.90-4.07) | 1.51 (0.73-3.15) | 0.81 (0.24-2.71) | 1.02 (0.40-2.63) | 0.51 (0.21-1.28) | 1.62 (0.83-3.15) | **0.20 (0.06-0.69)** | 1.05 (0.49-2.25) |
| Number of children (1) | | | | | | | | |
| 2 | 0.79 (0.56-1.12) | 0.79 (0.57-1.11) | 1.45 (0.86-2.46) | 1.02 (0.68-1.51) | 0.87 (0.64-1.20) | 0.77 (0.57-1.04) | **0.68 (0.49-0.94)** | **0.68 (0.50-0.93)** |
| 3 | 1.23 (0.47-3.18) | 1.06 (0.46-2.46) | 0.96 (0.17-5.40) | 1.56 (0.65-3.74) | 0.80 (0.33-1.93) | 1.29 (0.66-2.50) | 1.19 (0.51-2.79) | 1.33 (0.62-2.85) |
| ≥4 | 2.00 (0.15-27.60) | 0.83 (0.01-7.95) | 0.84 (0.01-14.22) | 2.43 (0.21-28.68) | 0.98 (0.09-10.88) | 0.29 (0.00-2.58) | 0.42 (0.00-7.23) | 1.05 (0.10-11.27) |
| Degree of mother (Junior high school and below) | | | | | | | | |
| High school/vocational high school | 1.11 (0.27-4.64) | 1.32 (0.24-7.42) | 0.97 (0.11-8.29) | 2.34 (0.41-13.21) | 0.44 (0.18-1.08) | 0.83 (0.31-2.24) | 1.13 (0.31-4.17) | 0.57 (0.17-1.92) |
| Undergraduate | 2.78 (0.73-10.50) | 3.34 (0.66-16.80) | 2.12 (0.27-16.50) | 1.85 (0.35-9.93) | 0.52 (0.23-1.15) | 0.77 (0.30-2.02) | 1.35 (0.40-4.52) | 0.95 (0.31-2.92) |
| Postgraduate | 3.26 (0.81-13.14) | 3.26 (0.62-17.16) | 1.93 (0.22-16.83) | 2.50 (0.44-14.36) | 0.50 (0.21-1.22) | 0.87 (0.31-2.42) | 1.47 (0.41-5.27) | 0.83 (0.26-2.72) |
| Degree of Father (Junior high school and below) | | | | | | | | |
| High school/vocational high school | 0.58 (0.15-2.17) | 0.79 (0.23-2.76) | 0.59 (0.08-4.41) | 1.31 (0.29-5.90) | 1.16 (0.43-3.16) | 1.34 (0.48-3.77) | 5.08 (0.95-27.31) | 0.75 (0.23-2.40) |
| Undergraduate | 0.75 (0.23-2.48) | 0.84 (0.27-2.63) | 0.54 (0.08-3.69) | 1.44 (0.35-5.89) | 1.60 (0.65-3.95) | 1.95 (0.72-5.28) | 5.17 (0.99-26.90) | 1.85 (0.65-5.30) |
| Postgraduate | 0.80 (0.23-2.84) | 0.88 (0.26-2.92) | 0.40 (0.05-3.09) | 1.00 (0.23-4.44) | 1.40 (0.52-3.74) | 2.07 (0.72-5.95) | **6.47 (1.19-35.30)** | 1.77 (0.58-5.39) |
| Premature birth (No) | | | | | | | | |
| Yes | 1.89 (0.97-3.71) | 1.28 (0.75-2.18) | 2.97 (0.79-11.11) | 0.96 (0.54-1.70) | 1.15 (0.70-1.89) | 0.96 (0.64-1.45) | 0.99 (0.57-1.72) | **2.44 (1.39-4.28)** |
| Birth mode (Vaginal delivery) | | | | | | | | |
| Cesarean section | 1.00 (0.73-1.37) | 1.25 (0.92-1.69) | 1.14 (0.69-1.88) | 0.76 (0.53-1.09) | 0.99 (0.75-1.32) | **0.73 (0.56-0.96)** | 0.94 (0.70-1.26) | 0.90 (0.68-1.20) |
| Breastfeeding duration (< 6months) | | | | | | | | |
| ≥6 months | 0.84 (0.60-1.18) | 1.23 (0.88-1.72) | 0.96 (0.56-1.65) | 0.79 (0.54-1.17) | 0.91 (0.67-1.25) | 0.98 (0.73-1.31) | 0.81 (0.59-1.13) | 1.06 (0.78-1.43) |
| Has the child ever had pneumonia (No) | | | | | | | | |
| Yes | **1.75 (1.23-2.48)** | **1.54 (1.10-2.16)** | **2.95 (1.76-4.95)** | **4.44 (3.01-6.55)** | 1.07 (0.75-1.52) | 1.08 (0.78-1.49) | 1.32 (0.95-1.83) | **1.85 (1.37-2.50)** |
| Has the child ever had Pediatric inflammation (No) | | | | | | | | |
| Yes | 1.27 (0.72-2.25) | 1.20 (0.69-2.09) | 1.38 (0.61-3.12) | 1.20 (0.64-2.26) | 1.31 (0.74-2.29) | **2.03 (1.24-3.34)** | 1.46 (0.86-2.47) | 1.24 (0.77-2.00) |
| Has the child ever received antibiotic treatment (No) | | | | | | | | |
| Yes | **1.64 (1.10-2.45)** | 1.20 (0.80-1.79) | **3.24 (1.50-7.01)** | **2.52 (1.39-4.56)** | 1.34 (0.94-1.90) | 1.37 (0.96-1.95) | **1.98 (1.35-2.88)** | 1.44 (0.99-2.10) |
| Family historyof allergy (No) | | | | | | | | |
| Yes | **2.03 (1.45-2.85)** | **2.58 (1.84-3.61)** | 1.52 (0.88-2.61) | **2.54 (1.69-3.80)** | **2.56 (1.88-3.48)** | **2.33 (1.75-3.10)** | **2.68 (1.94-3.71)** | **3.10 (2.29-4.20)** |
| Keep pets (No) | | | | | | | | |
| Yes | **0.62 (0.40-0.98)** | 0.87 (0.57-1.34) | 1.34 (0.73-2.46) | 0.78 (0.47-1.32) | 0.85 (0.57-1.25) | 0.74 (0.50-1.09) | 0.91 (0.62-1.36) | 1.09 (0.74-1.60) |
| Raising plants (No) | | | | | | | | |
| Yes | 0.89 (0.65-1.23) | 1.06 (0.78-1.44) | 0.90 (0.54-1.50) | 0.99 (0.68-1.44) | 0.98 (0.73-1.31) | 0.93 (0.70-1.22) | 0.80 (0.59-1.08) | 1.10 (0.83-1.46) |
| Fresh air systems use (No) | | | | | | | | |
| Sometimes | 0.99 (0.59-1.68) | 0.79 (0.46-1.36) | 1.31 (0.59-2.94) | 1.19 (0.65-2.18) | 0.96 (0.59-1.58) | 0.80 (0.49-1.30) | 0.71 (0.42-1.21) | 0.72 (0.44-1.20) |
| Often | 1.28 (0.67-2.42) | 1.21 (0.61-2.40) | 0.41 (0.09-1.86) | **0.27 (0.09-0.85)** | 0.71 (0.37-1.37) | 0.61 (0.32-1.16) | 1.04 (0.54-1.97) | 0.60 (0.29-1.24) |
| Mosquito repellents/mosquito repellents use (No) | | | | | | | | |
| Sometimes | 1.17 (0.83-1.63) | 0.98 (0.71-1.35) | 0.69 (0.41-1.17) | 0.86 (0.59-1.26) | 0.91 (0.67-1.24) | 1.06 (0.79-1.42) | 1.00 (0.73-1.38) | 0.87 (0.65-1.17) |
| Often | 0.81 (0.40-1.65) | 0.60 (0.30-1.17) | 0.73 (0.24-2.15) | 0.64 (0.28-1.42) | 1.37 (0.78-2.39) | 1.30 (0.79-2.12) | 0.94 (0.49-1.81) | 0.77 (0.43-1.40) |
| Air purifiers use (No) | | | | | | | | |
| Sometimes | 0.95 (0.66-1.38) | 1.32 (0.93-1.88) | 0.61 (0.33-1.15) | 0.88 (0.56-1.36) | 0.90 (0.64-1.27) | 1.20 (0.86-1.67) | 1.04 (0.73-1.48) | 0.87 (0.62-1.21) |
| Often | 1.01 (0.63-1.63) | 0.88 (0.55-1.41) | 1.44 (0.73-2.87) | 1.22 (0.72-2.07) | 0.76 (0.49-1.18) | 1.38 (0.94-2.03) | 1.03 (0.66-1.61) | 0.84 (0.54-1.30) |
| Incense/air fresheners use (No) | | | | | | | | |
| Sometimes | 0.90 (0.58-1.42) | 0.86 (0.55-1.33) | 0.62 (0.30-1.29) | 1.34 (0.81-2.21) | 0.82 (0.53-1.27) | 1.02 (0.68-1.53) | 1.10 (0.73-1.66) | 1.07 (0.73-1.59) |
| Often | 1.03 (0.41-2.57) | 0.85 (0.33-2.16) | 1.15 (0.33-4.01) | 0.49 (0.14-1.80) | 0.82 (0.32-2.09) | 0.90 (0.41-2.01) | 1.91 (0.87-4.20) | **2.20 (1.04-4.65)** |
| Open the Windows for ventilation within one day (0 times) | | | | | | | | |
| 1 | 0.45 (0.08-2.68) | 0.41 (0.07-2.22) | 0.93 (0.06-14.07) | **0.07 (0.01-0.37)** | 0.28 (0.05-1.46) | 0.38 (0.09-1.56) | 0.29 (0.04-1.97) | 0.23 (0.04-1.37) |
| 2 | 0.33 (0.06-1.97) | 0.84 (0.16-4.49) | 0.34 (0.02-5.24) | **0.11 (0.02-0.54)** | 0.25 (0.05-1.28) | 0.39 (0.10-1.59) | 0.33 (0.05-2.24) | 0.34 (0.06-1.95) |
| ≥3 | 0.38 (0.07-2.18) | 0.55 (0.10-2.95) | 0.38 (0.03-5.55) | **0.06 (0.01-0.29)** | 0.30 (0.06-1.50) | 0.38 (0.09-1.54) | 0.32 (0.05-2.16) | 0.33 (0.06-1.90) |
| Daily exercise time for children (＜ 2 hours) | | | | | | | | |
| ≥2h | **1.42 (1.02-1.95)** | 0.87 (0.63-1.19) | 0.89 (0.53-1.48) | 0.86 (0.59-1.25) | 1.18 (0.87-1.60) | 0.90 (0.68-1.19) | 0.82 (0.60-1.12) | 0.84 (0.63-1.11) |
| Daily sleep time of children (＜10 hours) | | | | | | | | |
| 10-12 h | 0.92 (0.63-1.34) | 1.05 (0.73-1.51) | 1.11 (0.62-1.99) | 0.92 (0.60-1.42) | 1.41 (1.00-1.99) | 0.91 (0.65-1.27) | 0.91 (0.64-1.28) | **1.48 (1.07-2.05)** |
| ≥12 h | 0.66 (0.36-1.19) | **0.51 (0.28-0.93)** | 0.23 (0.05-1.09) | 0.58 (0.28-1.23) | 0.99 (0.61-1.60) | 0.88 (0.56-1.38) | **0.35 (0.17-0.71)** | **0.41 (0.21-0.78)** |
| Are environment near the residence close to rivers, lakes, parks and green Spaces (No) | | | | | | | | |
| Yes | 1.02 (0.58-1.81) | 1.25 (0.69-2.26) | 1.46 (0.63-3.40) | 1.40 (0.69-2.86) | 1.02 (0.62-1.70) | 0.87 (0.50-1.50) | 0.76 (0.42-1.39) | 0.82 (0.45-1.49) |
| Residential floor (1-3 floors) | | | | | | | | |
| 4-6 floors | 1.01 (0.69-1.47) | 1.00 (0.69-1.45) | 1.01 (0.59-1.74) | 0.83 (0.54-1.29) | 1.21 (0.86-1.71) | 1.28 (0.93-1.76) | 1.05 (0.74-1.48) | 1.31 (0.94-1.82) |
| ≥7 floors | 1.31 (0.88-1.93) | 1.20 (0.82-1.75) | **0.40 (0.20-0.82)** | 1.12 (0.72-1.77) | 1.28 (0.89-1.82) | 1.12 (0.79-1.57) | 0.88 (0.60-1.29) | 1.07 (0.75-1.53) |
| Decoration situation of the permanent residence (Never) | | | | | | | | |
| Before pregnancy | 0.88 (0.46-1.68) | **1.81 (1.05-3.09)** | 0.90 (0.31-2.60) | 0.70 (0.32-1.54) | 0.84 (0.46-1.53) | **0.48 (0.26-0.91)** | 1.02 (0.56-1.88) | 0.91 (0.51-1.61) |
| during pregnancy | 1.55 (0.66-3.63) | 2.09 (0.93-4.72) | 1.04 (0.25-4.31) | 1.16 (0.41-3.28) | 0.97 (0.42-2.22) | 1.02 (0.44-2.39) | 0.58 (0.21-1.63) | 0.44 (0.16-1.23) |
| after birth | 0.99 (0.63-1.55) | 1.17 (0.77-1.79) | 1.74 (0.94-3.21) | 1.22 (0.75-1.99) | 1.26 (0.83-1.91) | 1.26 (0.85-1.87) | 1.36 (0.92-2.01) | 0.98 (0.67-1.44) |
| Wall materials for children's rooms (Others) | | | | | | | | |
| wall painting | 0.99 (0.70-1.41) | 1.13 (0.81-1.59) | 0.95 (0.54-1.66) | 1.00 (0.66-1.52) | 1.28 (0.94-1.74) | **1.37 (1.02-1.84)** | 0.98 (0.70-1.37) | 1.06 (0.78-1.46) |
| Habit of keeping Windows open in spring (No) | | | | | | | | |
| Sometimes | 1.26 (0.65-2.42) | 0.95 (0.49-1.83) | 0.80 (0.31-2.07) | 1.85 (0.82-4.16) | 0.86 (0.47-1.58) | 1.04 (0.56-1.96) | 1.02 (0.56-1.85) | 0.90 (0.49-1.66) |
| Often | 1.47 (0.57-3.83) | 0.83 (0.34-2.02) | 0.57 (0.13-2.50) | **2.89 (1.04-8.00)** | 0.68 (0.29-1.59) | **2.27 (1.02-5.04)** | 0.82 (0.32-2.08) | 1.19 (0.53-2.66) |
| Habit of keeping Windows open in summer (No) | | | | | | | | |
| Sometimes | 0.89 (0.58-1.38) | 0.90 (0.58-1.39) | 1.34 (0.69-2.61) | 1.09 (0.66-1.82) | 0.97 (0.65-1.45) | 0.89 (0.61-1.32) | 1.27 (0.84-1.93) | 1.02 (0.68-1.52) |
| Often | 0.73 (0.42-1.25) | 1.03 (0.62-1.71) | 1.06 (0.47-2.41) | 0.82 (0.45-1.49) | 0.61 (0.36-1.04) | 0.77 (0.48-1.22) | 0.92 (0.55-1.52) | 0.97 (0.61-1.54) |
| Habit of keeping Windows open in fall (No) | | | | | | | | |
| Sometimes | 0.69 (0.36-1.33) | 0.98 (0.51-1.90) | 1.14 (0.43-3.04) | 0.80 (0.36-1.76) | 1.06 (0.57-1.95) | 0.94 (0.50-1.76) | 1.11 (0.61-2.04) | 1.06 (0.57-1.96) |
| Often | 0.72 (0.27-1.87) | 0.78 (0.32-1.90) | 1.69 (0.40-7.14) | 0.93 (0.34-2.58) | 1.10 (0.46-2.61) | 0.69 (0.31-1.55) | 1.37 (0.54-3.52) | 1.05 (0.47-2.37) |
| Habit of keeping Windows open in winter (No) | | | | | | | | |
| Sometimes | 1.10 (0.69-1.76) | 1.23 (0.78-1.93) | 0.97 (0.47-2.01) | **0.49 (0.28-0.84)** | 1.09 (0.71-1.66) | 1.02 (0.68-1.51) | 0.67 (0.43-1.05) | 1.24 (0.83-1.87) |
| Often | 0.72 (0.36-1.44) | 1.40 (0.75-2.63) | 0.57 (0.17-1.86) | **0.44 (0.21-0.90)** | 1.40 (0.75-2.60) | 0.62 (0.36-1.08) | 0.86 (0.46-1.58) | 0.77 (0.44-1.33) |
| Mother's exposure to secondhand smoke from family members during pregnancy (No) | | | | | | | | |
| Yes | 1.43 (0.94-2.18) | 1.23 (0.81-1.87) | 1.02 (0.52-2.01) | 0.90 (0.54-1.50) | 1.41 (0.97-2.06) | 0.97 (0.65-1.46) | 1.08 (0.71-1.64) | 1.07 (0.71-1.59) |
| Mother smoking (No) | | | | | | | | |
| Yes | 1.05 (0.38-2.93) | 0.42 (0.09-2.03) | 2.87 (0.95-8.73) | 1.05 (0.29-3.76) | 0.55 (0.19-1.62) | 0.35 (0.07-1.64) | 0.89 (0.34-2.35) | 0.62 (0.18-2.16) |

Data were presented with OR and 95% CI; AOR adjusted odds ratio, CI confidence interval

Italic value indicates statistical significance (P < 0.05)

S4. Stratified Analysis: Multivariable Logistic Regression Results for Childhood Allergies and Independent Variables by Age.

| Variable | Food allergy (year) | | Asthma (year) | | Atopic dermatitis (year) | | Allergic rhinitis (year) | |
| --- | --- | --- | --- | --- | --- | --- | --- | --- |
| ＜3 | ≥3 | ＜3 | ≥3 | ＜3 | ≥3 | ＜3 | ≥3 |
| Birth weight | 0.92 (0.77-1.09) | 1.01 (0.98-1.04) | 0.90 (0.64-1.26) | 1.03 (1.00-1.06) | 1.00 (0.93-1.07) | 1.03 (1.00-1.05) | 1.01 (0.90-1.13) | 0.99 (0.96-1.02) |
| Number of months using air conditioners | 1.03 (0.94-1.14) | **1.10 (1.03-1.18)** | **1.21 (1.03-1.42)** | 1.07 (0.98-1.16) | 1.07 (1.00-1.14) | 1.06 (0.99-1.13) | 1.12 (1.00-1.25) | 1.05 (0.99-1.12) |
| Gender (Girls) | | | | | | | | |
| Boys | 0.92 (0.62-1.37) | 0.96 (0.74-1.24) | **3.54 (1.60-7.83)** | **1.72 (1.24-2.38)** | 1.08 (0.81-1.45) | 0.92 (0.71-1.19) | 1.05 (0.66-1.68) | 1.08 (0.86-1.35) |
| Race (Han) | | | | | | | | |
| Others | **2.85 (1.15-7.05)** | 1.38 (0.73-2.61) | 0.71 (0.05-9.37) | 1.11 (0.52-2.41) | 0.84 (0.35-2.01) | 1.19 (0.61-2.33) | 0.20 (0.00-1.46) | 0.68 (0.36-1.30) |
| Number of children (1) | | | | | | | | |
| 2 | 0.94 (0.59-1.51) | **0.74 (0.56-0.98)** | 1.69 (0.76-3.77) | 0.92 (0.65-1.29) | 0.87 (0.62-1.22) | **0.74 (0.56-0.99)** | **0.52 (0.28-0.94)** | **0.71 (0.56-0.90)** |
| 3 | 1.28 (0.51-3.18) | 0.85 (0.35-2.06) | 0.86 (0.14-5.23) | 1.97 (0.83-4.67) | 1.12 (0.57-2.20) | 1.00 (0.44-2.31) | 1.20 (0.41-3.53) | 1.26 (0.63-2.53) |
| ≥4 | 0.53 (0.00-7.48) | 1.18 (0.11-12.63) | **35.95 (1.51-854.57)** | 0.44 (0.00-5.05) | 0.64 (0.07-6.05) | 0.32 (0.00-3.39) | 1.10 (0.01-14.85) | 0.49 (0.04-5.34) |
| Degree of mother (Junior high school and below) | | | | | | | | |
| High school/vocational high school | 1.10 (0.28-4.32) | 2.50 (0.28-22.23) | 0.69 (0.08-6.05) | 2.33 (0.43-12.68) | 0.51 (0.23-1.13) | 1.15 (0.32-4.14) | 0.61 (0.08-4.83) | 0.83 (0.31-2.24) |
| Undergraduate | 2.08 (0.58-7.43) | **8.26 (1.02-67.11)** | 0.61 (0.08-4.46) | 2.44 (0.47-12.72) | **0.46 (0.22-0.95)** | 1.14 (0.34-3.81) | 1.51 (0.25-9.33) | 0.94 (0.37-2.38) |
| Postgraduate | 2.86 (0.72-11.40) | 8.25 (0.99-68.94) | 0.89 (0.10-8.23) | 2.84 (0.51-15.72) | 0.45 (0.19-1.03) | 1.24 (0.35-4.35) | 1.71 (0.25-11.63) | 0.80 (0.30-2.12) |
| Degree of Father (Junior high school and below) | | | | | | | | |
| High school/vocational high school | 0.47 (0.13-1.73) | 0.84 (0.23-3.09) | 1.74 (0.12-24.99) | 0.69 (0.19-2.50) | 1.30 (0.55-3.09) | 1.31 (0.37-4.72) | 1.21 (0.16-9.16) | 1.42 (0.51-3.96) |
| Undergraduate | 0.58 (0.18-1.87) | 0.93 (0.28-3.07) | 3.14 (0.25-38.88) | 0.73 (0.22-2.37) | 1.88 (0.83-4.28) | 2.08 (0.63-6.86) | 1.97 (0.30-13.00) | 2.27 (0.86-5.97) |
| Postgraduate | 0.53 (0.15-1.89) | 1.05 (0.30-3.61) | 1.62 (0.11-24.65) | 0.55 (0.16-1.92) | 2.41 (0.97-5.99) | 1.76 (0.51-6.12) | 1.86 (0.26-13.51) | 2.59 (0.94-7.10) |
| Premature birth (No) | | | | | | | | |
| Yes | 1.38 (0.75-2.55) | 1.54 (0.87-2.75) | 2.11 (0.68-6.56) | 0.95 (0.53-1.72) | 1.07 (0.72-1.60) | 1.01 (0.60-1.69) | **2.93 (1.23-7.00)** | 1.35 (0.86-2.12) |
| Birth mode (Vaginal delivery) | | | | | | | | |
| Cesarean section | 0.73 (0.49-1.09) | 1.30 (1.00-1.70) | 0.70 (0.34-1.45) | 0.93 (0.67-1.28) | **0.74 (0.56-0.99)** | 0.93 (0.71-1.21) | 0.81 (0.51-1.30) | 0.98 (0.78-1.22) |
| Breastfeeding duration (< 6months) | | | | | | | | |
| ≥6 months | 0.98 (0.63-1.52) | 1.04 (0.78-1.38) | 0.64 (0.29-1.43) | 0.81 (0.58-1.13) | 0.99 (0.72-1.35) | 0.92 (0.69-1.22) | 0.70 (0.42-1.16) | 0.98 (0.77-1.25) |
| Has the child ever had pneumonia (No) | | | | | | | | |
| Yes | **2.17 (1.24-3.79)** | **1.57 (1.20-2.06)** | **4.40 (1.85-10.46)** | **3.74 (2.69-5.19)** | 1.18 (0.75-1.86) | 1.05 (0.80-1.39) | 1.16 (0.62-2.19) | **1.64 (1.30-2.07)** |
| Has the child ever had Pediatric inflammation (No) | | | | | | | | |
| Yes | 2.29 (0.76-6.86) | 1.10 (0.73-1.68) | 1.82 (0.20-16.74) | 1.12 (0.68-1.82) | **3.44 (1.38-8.59)** | 1.36 (0.90-2.05) | 2.25 (0.60-8.36) | 1.34 (0.94-1.92) |
| Has the child ever received antibiotic treatment (No) | | | | | | | | |
| Yes | 1.25 (0.77-2.04) | 1.29 (0.89-1.87) | **2.48 (1.01-6.13)** | **2.30 (1.28-4.10)** | 1.20 (0.84-1.71) | 1.28 (0.89-1.83) | **2.03 (1.18-3.49)** | **1.49 (1.09-2.04)** |
| Family historyof allergy (No) | | | | | | | | |
| Yes | **2.01 (1.32-3.07)** | **2.44 (1.83-3.25)** | 1.82 (0.82-4.01) | **2.19 (1.53-3.13)** | **2.06 (1.53-2.79)** | **2.70 (2.01-3.63)** | **3.20 (1.89-5.44)** | **2.79 (2.19-3.55)** |
| Keep pets (No) | | | | | | | | |
| Yes | 0.74 (0.41-1.33) | 0.78 (0.54-1.12) | 2.35 (0.95-5.82) | 0.83 (0.54-1.29) | 0.88 (0.59-1.33) | 0.72 (0.49-1.05) | 1.03 (0.55-1.94) | 0.98 (0.72-1.33) |
| Raising plants (No) | | | | | | | | |
| Yes | 1.08 (0.72-1.64) | 0.99 (0.76-1.28) | 0.88 (0.41-1.89) | 0.98 (0.70-1.35) | 0.98 (0.73-1.33) | 0.94 (0.72-1.23) | 1.31 (0.82-2.11) | 0.92 (0.73-1.16) |
| Fresh air systems use (No) | | | | | | | | |
| Sometimes | 0.78 (0.38-1.59) | 0.87 (0.56-1.36) | **3.07 (1.08-8.77)** | 0.89 (0.51-1.55) | 0.78 (0.46-1.31) | 0.87 (0.55-1.38) | 0.88 (0.36-2.12) | 0.68 (0.46-1.01) |
| Often | 0.98 (0.46-2.11) | 1.22 (0.67-2.22) | 0.31 (0.04-2.20) | **0.33 (0.11-0.98)** | 0.65 (0.35-1.21) | 0.68 (0.33-1.38) | 1.41 (0.60-3.33) | 0.64 (0.36-1.14) |
| Mosquito repellents/mosquito repellents use (No) | | | | | | | | |
| Sometimes | 0.97 (0.63-1.51) | 1.08 (0.82-1.42) | 2.01 (0.91-4.42) | 0.72 (0.51-1.00) | 1.18 (0.86-1.63) | 0.88 (0.67-1.17) | 0.96 (0.57-1.59) | 0.92 (0.72-1.16) |
| Often | 0.48 (0.20-1.14) | 0.88 (0.48-1.60) | 1.09 (0.25-4.78) | 0.68 (0.33-1.42) | 1.37 (0.84-2.25) | 1.43 (0.82-2.49) | 1.01 (0.41-2.50) | 0.85 (0.51-1.42) |
| Air purifiers use (No) | | | | | | | | |
| Sometimes | **1.67 (1.03-2.70)** | 0.98 (0.73-1.33) | 0.74 (0.28-2.00) | 0.76 (0.52-1.11) | 1.07 (0.73-1.57) | 0.97 (0.71-1.31) | 1.25 (0.70-2.25) | 0.90 (0.69-1.17) |
| Often | 0.88 (0.49-1.58) | 1.02 (0.68-1.54) | 1.15 (0.44-2.96) | 1.29 (0.80-2.08) | 0.98 (0.65-1.46) | 1.06 (0.70-1.60) | 0.81 (0.42-1.56) | 1.01 (0.71-1.44) |
| Incense/air fresheners use (No) | | | | | | | | |
| Sometimes | 1.03 (0.50-2.12) | 0.86 (0.61-1.22) | 0.40 (0.10-1.59) | 1.06 (0.69-1.62) | 1.22 (0.72-2.07) | 0.79 (0.55-1.14) | 1.47 (0.68-3.18) | 1.06 (0.79-1.42) |
| Often | 0.66 (0.14-3.16) | 1.06 (0.51-2.20) | 0.19 (0.00-2.28) | 0.93 (0.37-2.34) | 0.84 (0.30-2.36) | 0.85 (0.40-1.79) | 3.03 (0.92-10.02) | 1.72 (0.95-3.13) |
| Open the Windows for ventilation within one day (0 times) | | | | | | | | |
| 1 | 0.33 (0.08-1.42) | 0.94 (0.08-10.45) | **0.06 (0.01-0.37)** | 0.75 (0.06-9.77) | 0.46 (0.14-1.54) | 0.25 (0.03-2.08) | **0.09 (0.02-0.49)** | 1.27 (0.12-13.15) |
| 2 | 0.39 (0.09-1.66) | 1.26 (0.11-14.06) | **0.03 (0.00-0.22)** | 0.76 (0.06-9.97) | 0.35 (0.10-1.15) | 0.34 (0.04-2.83) | 0.22 (0.05-1.09) | 1.45 (0.14-15.00) |
| ≥3 | 0.38 (0.09-1.62) | 1.02 (0.09-11.22) | **0.05 (0.01-0.29)** | 0.41 (0.03-5.37) | 0.40 (0.12-1.32) | 0.30 (0.04-2.44) | **0.19 (0.04-0.91)** | 1.44 (0.14-14.76) |
| Daily exercise time for children (＜ 2 hours) | | | | | | | | |
| ≥2h | 1.25 (0.81-1.92) | 1.00 (0.76-1.30) | 0.67 (0.30-1.48) | 0.89 (0.64-1.24) | 0.87 (0.63-1.20) | 1.07 (0.82-1.40) | 0.87 (0.53-1.43) | **0.77 (0.61-0.96)** |
| Daily sleep time of children (＜10 hours) | | | | | | | | |
| 10-12 h | 0.86 (0.52-1.43) | 0.98 (0.73-1.32) | 0.67 (0.28-1.64) | 1.06 (0.74-1.51) | 1.46 (0.96-2.21) | 1.04 (0.78-1.40) | 0.82 (0.47-1.41) | 1.20 (0.93-1.54) |
| ≥12 h | **0.50 (0.30-0.86)** | 1.06 (0.42-2.64) | 0.48 (0.18-1.26) | 0.94 (0.29-3.06) | 1.25 (0.82-1.89) | 0.83 (0.31-2.21) | **0.25 (0.13-0.48)** | 0.79 (0.33-1.89) |
| Are environment near the residence close to rivers, lakes, parks and green Spaces (No) | | | | | | | | |
| Yes | 1.12 (0.57-2.20) | 1.31 (0.78-2.20) | 0.79 (0.23-2.65) | 1.52 (0.82-2.83) | 0.94 (0.58-1.53) | 0.90 (0.51-1.59) | 1.12 (0.49-2.56) | 0.73 (0.45-1.20) |
| Residential floor (1-3 floors) | | | | | | | | |
| 4-6 floors | 0.83 (0.50-1.37) | 1.10 (0.81-1.49) | 0.40 (0.15-1.06) | 1.03 (0.71-1.49) | 1.26 (0.89-1.80) | 1.23 (0.90-1.69) | 1.59 (0.91-2.78) | 1.11 (0.85-1.45) |
| ≥7 floors | 1.17 (0.73-1.90) | 1.24 (0.89-1.73) | 0.72 (0.30-1.69) | 0.83 (0.55-1.26) | 1.24 (0.87-1.78) | 1.13 (0.80-1.59) | 1.00 (0.55-1.83) | 0.98 (0.73-1.30) |
| Decoration situation of the permanent residence (Never) | | | | | | | | |
| Before pregnancy | 0.75 (0.35-1.61) | **1.73 (1.06-2.82)** | 1.40 (0.42-4.69) | 0.63 (0.30-1.32) | 0.67 (0.37-1.21) | 0.67 (0.36-1.25) | 0.50 (0.18-1.38) | 1.17 (0.74-1.87) |
| during pregnancy | 1.85 (0.66-5.19) | 1.57 (0.75-3.28) | 2.49 (0.41-15.12) | 1.23 (0.47-3.18) | 0.72 (0.28-1.81) | 1.11 (0.50-2.44) | **0.09 (0.00-0.76)** | 0.70 (0.33-1.49) |
| after birth | 0.90 (0.39-2.08) | 1.14 (0.82-1.58) | 2.28 (0.66-7.81) | 1.31 (0.88-1.95) | 1.23 (0.69-2.20) | 1.25 (0.90-1.75) | 0.94 (0.40-2.21) | 1.21 (0.91-1.62) |
| Wall materials for children's rooms (Others) | | | | | | | | |
| wall painting | 1.29 (0.84-1.98) | 0.96 (0.71-1.29) | 0.98 (0.43-2.21) | 1.05 (0.72-1.51) | **1.40 (1.03-1.91)** | 1.19 (0.89-1.60) | 0.74 (0.43-1.28) | 1.14 (0.88-1.47) |
| Habit of keeping Windows open in spring (No) | | | | | | | | |
| Sometimes | 2.13 (0.79-5.74) | 0.85 (0.50-1.44) | 1.42 (0.25-8.13) | 1.33 (0.71-2.50) | 0.90 (0.45-1.82) | 0.95 (0.55-1.63) | 0.95 (0.31-2.95) | 0.93 (0.59-1.47) |
| Often | 2.02 (0.62-6.59) | 0.81 (0.38-1.72) | 2.71 (0.38-19.10) | 1.51 (0.62-3.66) | 1.08 (0.47-2.50) | 1.62 (0.73-3.59) | 0.37 (0.08-1.68) | 1.20 (0.63-2.32) |
| Habit of keeping Windows open in summer (No) | | | | | | | | |
| Sometimes | 0.75 (0.43-1.32) | 1.07 (0.74-1.55) | 0.94 (0.33-2.68) | 1.14 (0.74-1.75) | 0.97 (0.63-1.48) | 0.84 (0.58-1.22) | 1.17 (0.60-2.28) | 1.01 (0.74-1.40) |
| Often | **0.45 (0.21-0.99)** | 1.17 (0.76-1.80) | 2.04 (0.61-6.85) | 0.70 (0.41-1.18) | 0.82 (0.47-1.42) | **0.61 (0.39-0.95)** | 1.62 (0.71-3.71) | 0.88 (0.61-1.27) |
| Habit of keeping Windows open in fall (No) | | | | | | | | |
| Sometimes | 0.58 (0.22-1.57) | 0.87 (0.51-1.47) | 1.67 (0.29-9.65) | 0.79 (0.42-1.49) | 0.89 (0.44-1.81) | 1.11 (0.64-1.93) | 1.98 (0.62-6.27) | 0.96 (0.60-1.52) |
| Often | 0.69 (0.21-2.27) | 0.69 (0.32-1.47) | 1.06 (0.14-8.00) | 1.14 (0.47-2.76) | 1.11 (0.47-2.60) | 0.58 (0.26-1.32) | **5.09 (1.12-23.09)** | 0.86 (0.45-1.67) |
| Habit of keeping Windows open in winter (No) | | | | | | | | |
| Sometimes | 1.02 (0.58-1.78) | 1.27 (0.85-1.91) | 0.45 (0.16-1.21) | 0.70 (0.43-1.15) | 1.15 (0.75-1.75) | 1.06 (0.70-1.59) | 0.64 (0.34-1.20) | 1.14 (0.81-1.61) |
| Often | 0.80 (0.33-1.96) | 1.24 (0.71-2.15) | 0.22 (0.05-1.05) | 0.62 (0.31-1.22) | 0.81 (0.44-1.50) | 1.06 (0.60-1.85) | **0.31 (0.11-0.83)** | 1.00 (0.64-1.58) |
| Mother's exposure to secondhand smoke from family members during pregnancy (No) | | | | | | | | |
| Yes | 1.30 (0.75-2.26) | **1.45 (1.02-2.06)** | 1.25 (0.48-3.26) | 0.88 (0.56-1.38) | 1.07 (0.71-1.62) | 1.27 (0.88-1.83) | 1.15 (0.59-2.24) | 1.04 (0.76-1.43) |
| Mother smoking (No) | | | | | | | | |
| Yes | 0.42 (0.07-2.52) | 0.92 (0.34-2.45) | 0.93 (0.14-6.43) | 1.85 (0.72-4.74) | 0.87 (0.25-3.02) | 0.40 (0.11-1.36) | 2.14 (0.42-10.80) | 0.64 (0.27-1.51) |

Data were presented with OR and 95% CI; AOR adjusted odds ratio, CI confidence interval

The bold value indicates statistical significance (P < 0.05)
